# Supplementary material for: Graphene-Binding Peptide in Fusion with SARS-CoV-2 Antigen for Electrochemical Immunosensor Construction
Source: MDPI journal article supplement (doi:10.3390/bios12100885), 2022-10-17
Supplement: s1 [file s1]

# **Graphene-binding peptide in fusion with SARS-CoV-2 antigen for electrochemical immunosensor construction**

*Beatriz A. Braz<sup>1,2</sup>, Manuel Hospinal-Santiani<sup>1</sup>, Gustavo Martinz<sup>2</sup>, Cristian S. Pinto<sup>3</sup>, Aldo J. G. Zarbin<sup>3</sup>, Breno C. B. Beirão<sup>4</sup>, Vanete Thomaz-Soccol<sup>1</sup>, Márcio F. Bergamini<sup>2</sup>, Luiz H. Marcolino-Junior<sup>2\*</sup>, Carlos R. Soccol<sup>1</sup>.*

<sup>1</sup> Molecular Biology Laboratory, Graduate Program in Bioprocess Engineering and Biotechnology, Federal University of Paraná (UFPR), 81531-980, Curitiba, Paraná, Brazil.

<sup>2</sup> Laboratory of Electrochemical Sensors (LabSense), Department of Chemistry, Federal University of Paraná (UFPR), CP 19032, 81531-980, Curitiba, Paraná, Brazil.

<sup>3</sup> Materials Chemistry Group (GQM), Department of Chemistry, Federal University of Paraná (UFPR). CP 19032, 81531-980 Curitiba, Paraná, Brazil.

<sup>4</sup> Graduate Program in Microbiology, Parasitology, and Pathology, Federal University of Paraná (UFPR), 81531-980, Curitiba, Paraná, Brazil.

\*Corresponding author: [luiz1berto@ufpr.br](mailto:luiz1berto@ufpr.br)

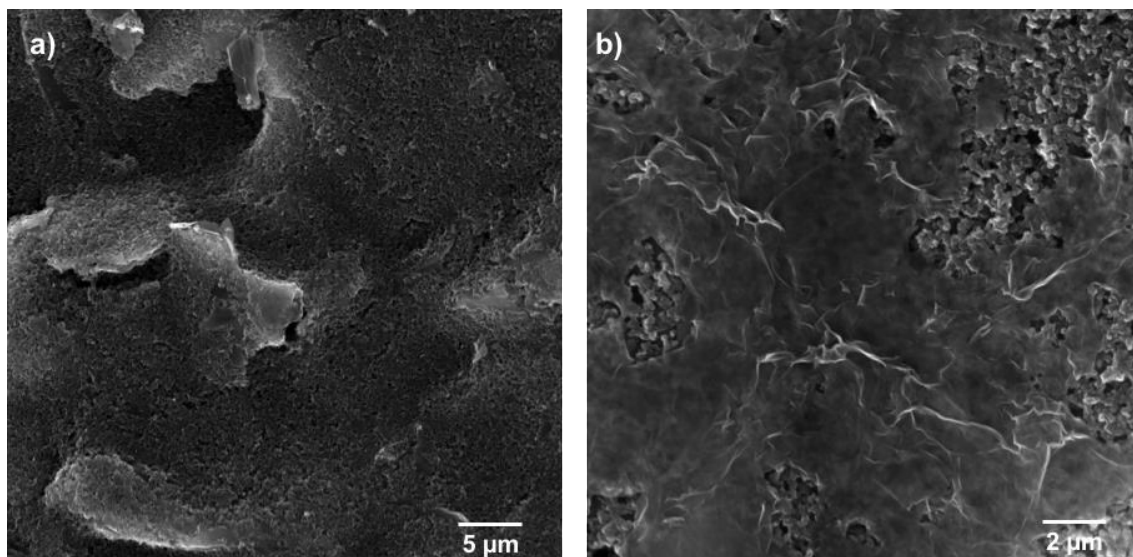

**Figure S1.** SEM images a) SPE – C surface and b) SPE with rGO.

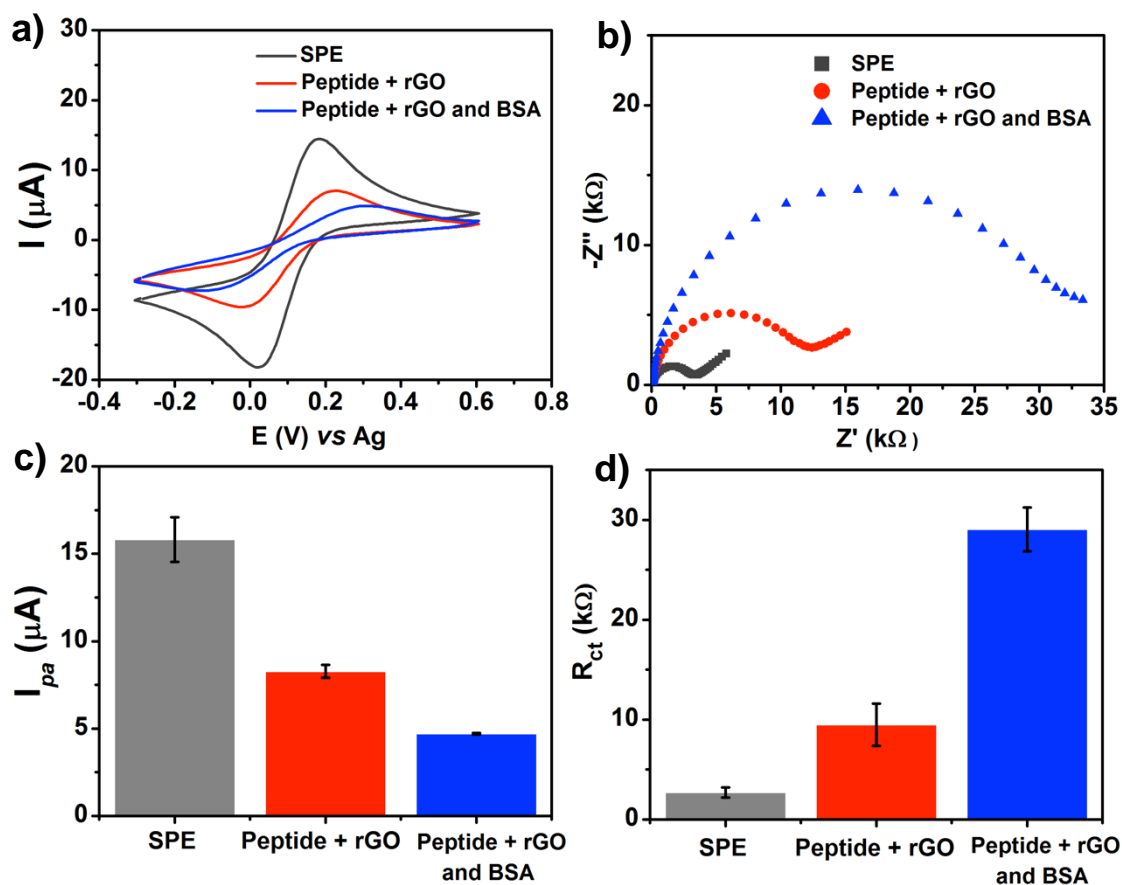

**Figure S2.** CVs and EIS measurements of each step of the immunosensor construction: a) CVs obtained for each step of the immunosensor construction with peptide, rGO and BSA, with  $1 \text{ mmol L}^{-1} \text{ K}_3[\text{Fe}(\text{CN})_6]$  in PBS  $0.1 \text{ mol L}^{-1}$  at  $50 \text{ mV s}^{-1}$ . b) Nyquist plots obtained from EIS measurements in each step of the immunosensor building up, with  $1 \text{ mmol L}^{-1} \text{ K}_3[\text{Fe}(\text{CN})_6]$  in PBS  $0.1 \text{ mol L}^{-1}$  and AC amplitude of  $10 \text{ mV}$  c) Summarized data obtained from probe anodic current peak ( $I_{pa}$ ) to each step of building up the sensor ( $n=3$ ,  $\pm\text{SD}$ ). d) Summarized data obtained from charge transfer resistance ( $R_{ct}$ ) to each step of sensor construction ( $n=3$ ,  $\pm\text{SD}$ ).

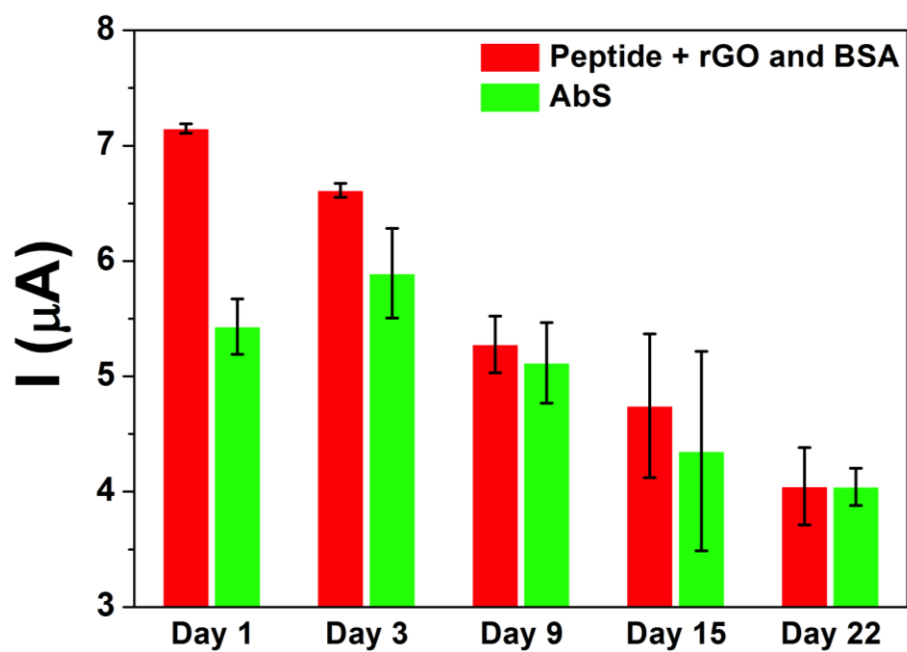

**Figure S3.** DPV data summarized for stability test of immunosensor readout stored over the time ( $n = 3, \pm$  SD).
